# Supplementary material for: Urine protein quantification in human urine on boron-doped diamond electrodes based on the electrochemical reaction of Coomassie brilliant blue
Source: Royal Society of Chemistry journal article supplement (doi:10.1039/d3an01000g), 2023-01-01
Supplement: d3an01000g1.pdf [file d3an01000g1.pdf]

## **Urine Protein Quantification in Human Urine on Boron-Doped Diamond Electrodes based on Electrochemical Reaction of Coomassie Brilliant Blue**

Hiroshi Aoki,<sup>1,2,\*</sup> Risa Miyazaki,<sup>1,2</sup> Miho Ohama,<sup>1,2</sup> Michio Murata,<sup>2</sup> Kai Asai,<sup>2,3</sup>  
Genki Ogata,<sup>2</sup> Yasuaki Einaga<sup>2,\*</sup>

<sup>1</sup> *Environmental Management Research Institute, National Institute of Advance Industrial Science and Technology (AIST), 16-1 Onogawa, Tsukuba 305-8569, Japan*

<sup>2</sup> *Department of Chemistry, Faculty of Science and Technology, Keio University, 3-14-1 Hiyoshi, Yokohama 223-8522, Japan*

<sup>3</sup> *Department of Sensor Development, First Screening Co., Ltd., 1-30-14 Yoyogi, Shibuya 151-0053, Japan*

### **Supplementary Information**

---

\* To whom correspondence should be addressed. E-mail: aoki-h@aist.go.jp (H.A.),  
einaga@chem.keio.ac.jp (Y.E.)

### List of captions

**Table S1.** The concentrations of protein contained in urine samples calculated by colorimetric protein analysis using the Bradford method

**Fig. S1.** Dependence of absorbance of CBB at 595 nm on concentration of bovine serum albumin (BSA) at room temperature. The dotted line shows a best fit to the data using least-squares linear regression.

**Fig. S2.** LSVs for the oxidative reaction of CBB on a BDD electrode in 1X PBS (black line) containing 125  $\mu\text{g/mL}$  BSA (red line), 125  $\mu\text{g/mL}$  BSA + urine (blue line), 125  $\mu\text{g/mL}$  BSA + urine + uricase (green line), scanned from 0 to +1.0 V at a scan rate of 0.1  $\text{V s}^{-1}$  at room temperature. The urine sample used here is Urine sample A.

**Fig. S3.** LSVs for the oxidative reaction of CBB on a BDD electrode in 1X PBS containing urine + uricase + 31.25 (black line), 62.5 (green line), or 125  $\mu\text{g/mL}$  BSA (red line), scanned from 0 to +1.0 V at a scan rate of 0.1  $\text{V s}^{-1}$  at room temperature. The urine sample used here is Urine sample A.

**Fig. S4.** Plots of values of the reduction currents at  $-0.385$  V (A), the ratio of the current at  $-0.385$  V ( $i_{-0.385 \text{ v}}$ ) over the current at  $-0.2$  V ( $i_{-0.2 \text{ v}}$ ) (B), and plots of values of the ratio of the current at  $-0.385$  V ( $i_{-0.385 \text{ v}}$ ) minus that at  $-0.1$  V ( $i_{-0.1 \text{ v}}$ ) over the current at  $-0.2$  V ( $i_{-0.2 \text{ v}}$ ) minus that at  $-0.1$  V ( $i_{-0.1 \text{ v}}$ ) (C) in LSVs of CBB dependent on protein concentrations in Urine sample A at room temperature. The protein concentration was adjusted by adding a certain amount of BSA to the solution as described in Figure 2. The dotted lines show a best fit to the data using least-squares linear regression.

**Fig. S5.** Plots of values of the ratio of the current at  $-0.3$  V ( $i_{-0.3 \text{ v}}$ ) minus that at  $-0.1$  V ( $i_{-0.1 \text{ v}}$ ) in DPVs of the concentrated CBB dependent on protein concentrations in Urine sample A at room temperature. Other conditions are the same as listed in the caption to Fig. 4.

**Table S1.** The concentrations of protein contained in urine samples calculated by colorimetric protein analysis using the Bradford method

| Urine sample | protein [ $\mu\text{g/mL}$ ] |
|--------------|------------------------------|
| A            | $25.2 \pm 1.8$               |
| B            | $34.8 \pm 0.9$               |
| C            | $37.1 \pm 0.7$               |
| D            | $17.7 \pm 1.0$               |

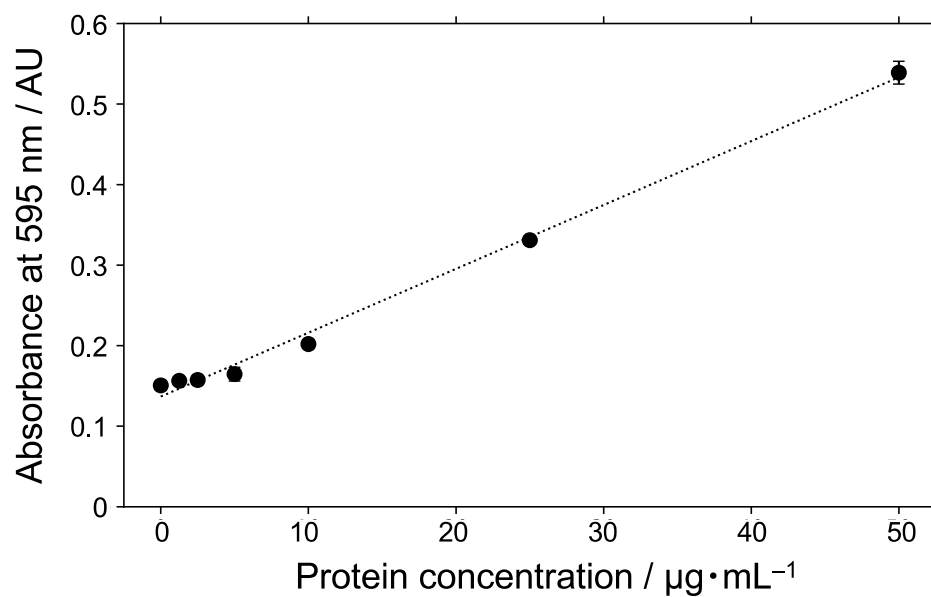

**Figure S1.** Dependence of absorbance of CBB at 595 nm on concentration of bovine serum albumin (BSA) at room temperature. The dotted line shows a best fit to the data using least-squares linear regression.

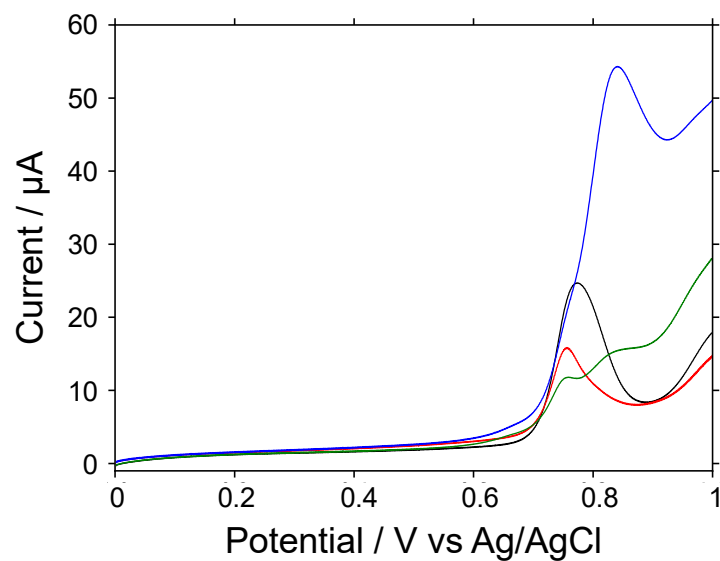

**Figure S2.** LSVs for the oxidative reaction of CBB on a BDD electrode in 1X PBS (black line) containing 125  $\mu\text{g/mL}$  BSA (red line), 125  $\mu\text{g/mL}$  BSA + urine (blue line), 125  $\mu\text{g/mL}$  BSA + urine + uricase (green line), scanned from 0 to +1.0 V at a scan rate of 0.1  $\text{V s}^{-1}$  at room temperature. The urine sample used here is Urine sample A.

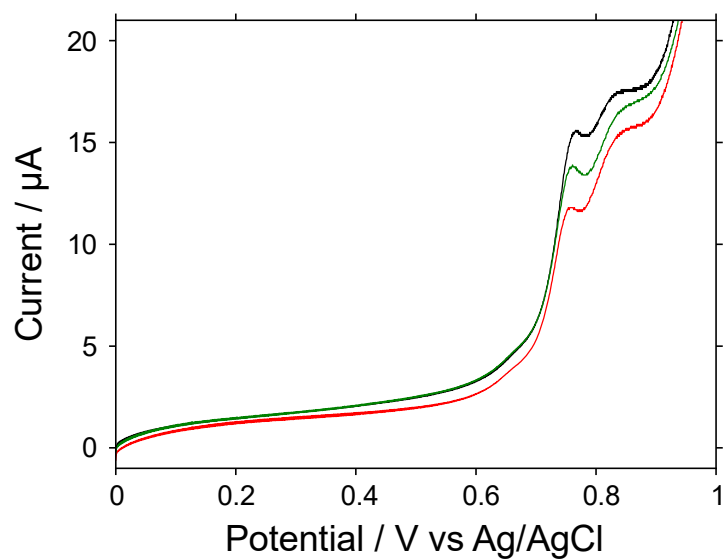

**Figure S3.** LSVs for the oxidative reaction of CBB on a BDD electrode in 1X PBS containing urine + uricase + 31.25 (black line), 62.5 (green line), or 125  $\mu\text{g/mL}$  BSA (red line), scanned from 0 to +1.0 V at a scan rate of  $0.1 \text{ V s}^{-1}$  at room temperature. The urine sample used here is Urine sample A.

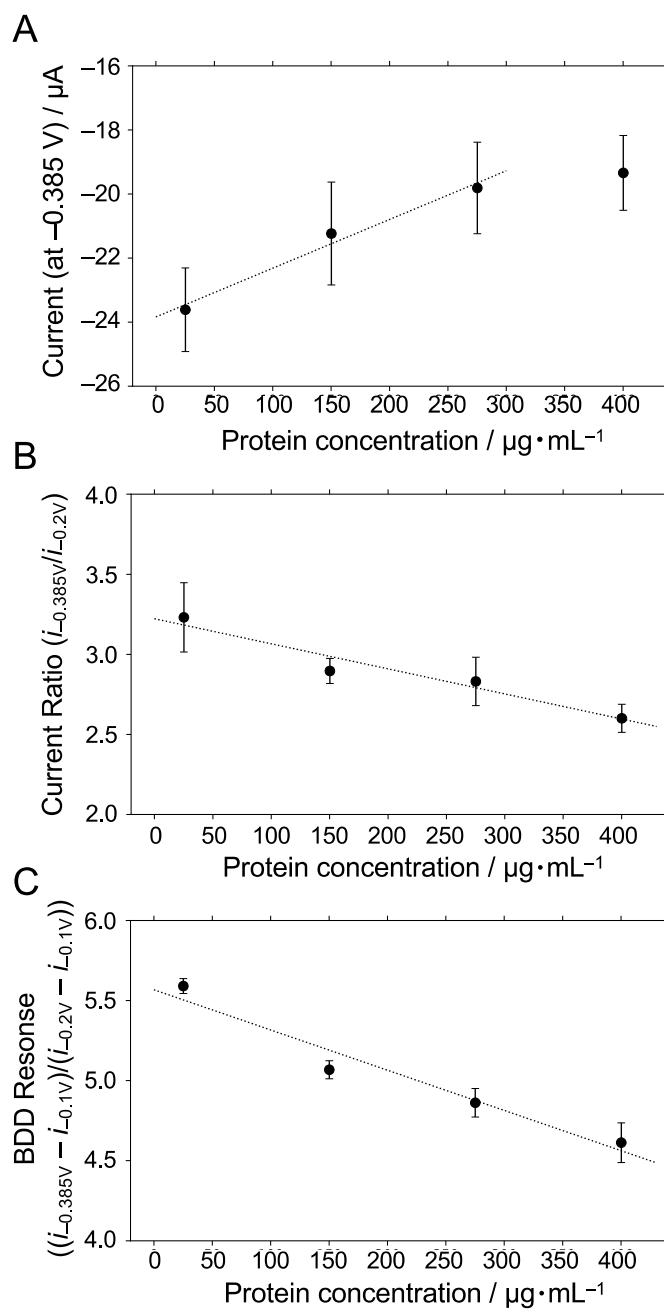

**Figure S4.** Plots of values of the reduction currents at  $-0.385\text{ V}$  (A), the ratio of the current at  $-0.385\text{ V}$  ( $i_{-0.385\text{ V}}$ ) over the current at  $-0.2\text{ V}$  ( $i_{-0.2\text{ V}}$ ) (B), and plots of values of the ratio of the current at  $-0.385\text{ V}$  ( $i_{-0.385\text{ V}}$ ) minus that at  $-0.1\text{ V}$  ( $i_{-0.1\text{ V}}$ ) over the current at  $-0.2\text{ V}$  ( $i_{-0.2\text{ V}}$ ) minus that at  $-0.1\text{ V}$  ( $i_{-0.1\text{ V}}$ ) (C) in LSVs of CBB dependent on protein concentrations in Urine sample A at room temperature. The protein concentration was adjusted by adding a certain amount of BSA to the solution as described in Figure 2. The dotted lines show a best fit to the data using least-squares linear regression.

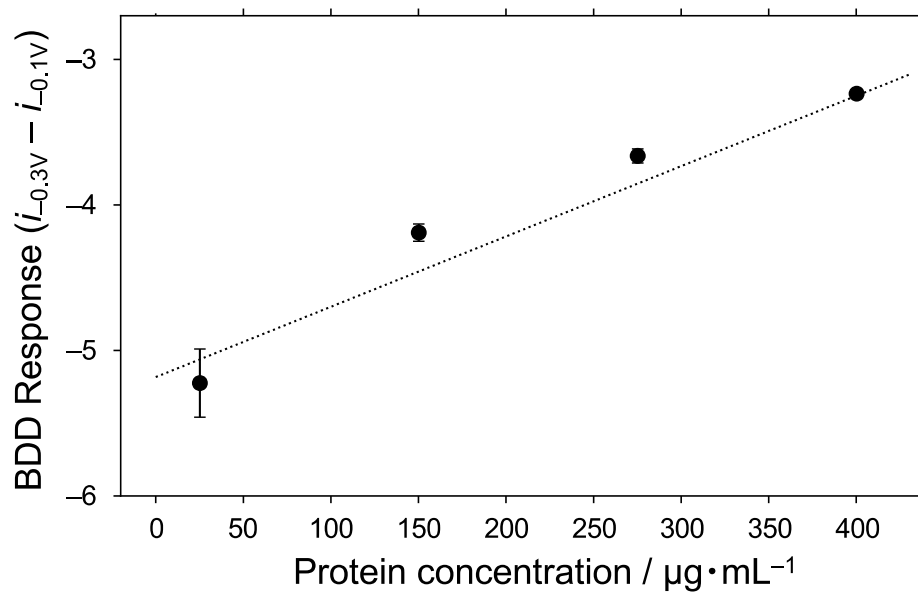

**Fig. S5.** Plots of values of the ratio of the current at  $-0.3\text{ V}$  ( $i_{-0.3\text{ V}}$ ) minus that at  $-0.1\text{ V}$  ( $i_{-0.1\text{ V}}$ ) in DPVs of the concentrated CBB dependent on protein concentrations in Urine sample A at room temperature. Other conditions are the same as listed in the caption to Fig. 4.
